# Supplementary material for: Death Induced by Survival gene Elimination (DISE) correlates with neurotoxicity in Alzheimer’s disease and aging
Source: Nat Commun. 2024 Jan 18;15:264. doi: 10.1038/s41467-023-44465-8 (PMC10796375; doi:10.1038/s41467-023-44465-8)
Supplement: Supplementary file 4 — Source Data [file 41467_2023_44465_MOESM4_ESM.xlsx]

## Sheet: Fig 1b
	6-month old					8-month old
	OBJECT COUNT			AVERAGE COUNT		OBJECT COUNT			AVERAGE COUNT
GENOTYPE	FIELD 1	FIELD 2	FIELD 3			FIELD 1	FIELD 2	FIELD 3
5XFADNeg/Rubicon+/-	18	9	18	15		19	16	16	17
5XFADNeg/Rubicon+/-	0	1	5	2		16	21	17	18
5XFADNeg/Rubicon+/-	14	19	6	13		2	6	4	4
5XFADNeg/Rubicon+/-	7	5	12	8		4	7	7	6
5XFADNeg/Rubicon+/-	6	7	2	5		6	5	10	7
5XFADNeg/Rubicon+/-	8	10	15	11		13	9	11	11
5XFADNeg/Rubicon-/-	4	18	14	12		22	16	25	21
5XFADNeg/Rubicon-/-	3	14	13	10		23	14	14	17
5XFADNeg/Rubicon-/-	9	9	6	8		13	20	15	16
5XFADNeg/Rubicon-/-	3	3	3	3		19	13	10	14
5XFADNeg/Rubicon-/-	4	8	3	5		5	8	14	9
5XFADNeg/Rubicon-/-	8	6	7	7		4	6	5	5
5XFADTG/Rubicon+/-	21	18	24	21		44	51	49	48
5XFADTG/Rubicon+/-	21	12	15	16		33	37	35	35
5XFADTG/Rubicon+/-	10	6	11	9		15	16	26	19
5XFADTG/Rubicon+/-	11	3	10	8		14	20	20	18
5XFADTG/Rubicon+/-	7	7	4	6		16	13	19	16
5XFADTG/Rubicon+/-	5	7	9	7		9	11	13	11
5XFADTG/Rubicon-/-	44	48	40	44		158	128	134	140
5XFADTG/Rubicon-/-	90	88	97	88		121	151	127	133
5XFADTG/Rubicon-/-	92	87	100	93		115	136	112	121
5XFADTG/Rubicon-/-	81	84	69	78		96	85	101	94
5XFADTG/Rubicon-/-	66	49	62	59		80	95	83	86
5XFADTG/Rubicon-/-	51	64	56	57		74	67	72	71

## Sheet: Fig 1d
6mer seed viability(%)	Read Counts
	Het	Rubicon-/-
1	0	0
2	0	0
3	0	0
4	0.961022	1.59923
5	4.39265	42.5726
6	86.5407	27.6396
7	0	0
8	27.7149	49.6779
9	12.0085	15.479
10	5.33671	4.06579
11	3.53562	4.53679
12	4.84628	3.09967
13	5.41981	13.8603
14	12.541	9.70007
15	10.4262	0.63608
16	0.385049	5.25619
17	9.5149	9.65934
18	116.325	77.4876
19	9.59893	82.1675
20	17.038	4.55844
21	38.0164	80.4284
22	39.7305	21.1188
23	56.9826	58.9494
24	26.8328	17.3683
25	149.955	171.088
26	30.4025	34.2367
27	6.96319	18.0158
28	16.745	20.8865
29	8.16795	14.4781
30	14.2586	22.8315
31	13.4708	23.3577
32	46.2863	24.5212
33	44.0273	329.184
34	52.6003	106.84
35	8.01265	27.6093
36	6.53047	9.78857
37	12.3178	37.2736
38	128.94	231.989
39	13.6925	20.2064
40	18.4583	25.8597
41	15.0861	21.2769
42	1.27632	27.7125
43	74.7674	79.5422
44	58.933	48.1192
45	0.375446	4.68296
46	9.95845	24.8136
47	16.8523	55.5511
48	108.765	89.9122
49	47.0917	30.4025
50	7672.69	9421.69
51	62.0412	34.2837
52	725.475	146.544
53	17.4264	33.0419
54	445.292	755.906
55	103.471	112.237
56	46.2601	60.2095
57	163.907	112.016
58	45.549	55.3056
59	46.9905	45.0767
60	2159.66	3403.45
61	33403.1	47475.8
62	49.7313	29.0035
63	62.1665	110.076
64	36.9713	87.2951
65	2216.14	432.928
66	3507.48	5227.09
67	58.3645	88.6235
68	35.3468	57.8646
69	177.204	71.2167
70	94.7011	152
71	2661.57	650.654
72	6793.31	8420.7
73	49.9345	33.1864
74	26.4351	51.8598
75	85.257	127.475
76	121.014	131.773
77	104.232	144.354
78	98.4626	119.433
79	143.95	229.497
80	81.334	119.889
81	68.8267	127.451
82	2185.83	912.114
83	113.037	184.901
84	339.151	208.19
85	7.70152	9.33662
86	782.752	1034.87
87	929.176	410.513
88	194.63	101.84
89	20.0185	7.75684
90	3.0323	11.9438
91	7.33792	7.04192
92	2.68414	0
93	1.23354	0
94	2.42559	14.226
95	22.1235	20.9996
96	12.5015	27.2649
97	0.748446	2.01736
98	3.9452	0.113828
99	0	0
100	0	0
101	0	0
102	0	0
103	0	0
104	0	0
105	0	0
106	0	0
107	0	0
108	3.14119	13.0903
109	0	0
110	0	0
111	0	0
112	0	0
113	0	0
114	0	0
115	0	0
116	0	0
117	0	0
118	0	0
119	0	0
120	0	0

## Sheet: Fig 1d inset
Seed viability (%)
Lo in Rub-/-	Hi in Rub-/-
5.8	5.1
5.8	5.1
5.8	7.5
5.8	19.3
5.8	19.3
5.8	20.7
14.3	20.7
14.6	22.9
18.1	25.1
18.1	25.1
18.1	25.1
18.1	25.1
18.1	33.2
18.1	33.2
18.1	33.2
19.7	33.2
20.4	33.2
21.2	33.2
21.5	33.2
22.1	33.2
22.2	33.2
22.4	33.2
22.8	33.2
23.7	33.2
25.1	33.9
25.1	33.9
25.1	35.1
25.4	37.2
25.4	38.1
25.4	38.4
25.4	38.4
25.4	38.4
25.4	41.7
25.7	44.2
31.2	46.9
31.8	47.4
31.8	47.7
32.4	49.5
32.6	50.3
38.6	50.3
40	50.3
40.5	50.3
43	50.3
43.2	50.3
43.2	50.3
44.2	50.3
44.3	50.3
44.4	50.3
44.4	50.3
47.6	50.3
47.6	50.3
47.6	50.3
47.6	50.3
48.8	50.3
48.8	50.3
48.8	50.3
50.9	50.3
51.3	50.3
51.3	50.3
51.3	50.3
52.5	50.3
52.5	50.3
52.5	50.3
52.5	50.3
52.5	50.3
52.5	50.3
52.5	50.3
52.5	50.3
52.5	50.3
52.5	50.3
52.5	50.3
52.5	50.3
52.5	50.3
52.5	50.3
52.5	50.3
52.5	50.3
52.5	50.3
52.5	50.3
52.5	50.3
52.5	50.3
52.5	50.3
52.5	50.3
52.5	50.3
52.5	50.3
52.5	50.3
52.5	50.3
52.5	50.3
52.5	50.3
52.5	50.3
52.5	50.3
52.5	50.3
52.5	50.3
52.5	50.3
52.5	50.3
52.5	50.3
52.5	50.3
52.5	50.3
52.5	50.3
52.5	50.3
52.5	50.3
52.5	50.3
52.5	50.3
52.5	50.3
52.5	50.3
52.5	50.4
52.5	50.4
52.5	51.6
52.5	53
52.5	54.3
52.5	54.3
52.5	54.3
52.5	54.3
52.5	54.3
52.5	54.3
52.5	54.3
52.5	54.3
52.5	54.3
52.5	54.3
52.5	54.3
52.5	54.3
52.5	55.2
52.5	55.3
52.5	55.6
52.5	57.3
52.5	57.9
52.5	59.1
52.5	60.2
52.7	60.2
53.5	60.2
54.9	60.2
54.9	60.4
55	60.4
55	60.4
55	60.4
55.9	60.4
56.5	60.4
56.6	60.4
56.6	60.4
56.6	60.4
56.6	60.4
56.6	60.4
57.2	60.4
57.2	60.4
57.2	60.4
57.2	60.4
57.5	60.4
57.7	60.4
58.5	60.4
58.6	60.4
58.7	60.4
58.8	60.4
59.8	60.4
59.8	60.4
59.8	60.4
59.8	60.4
59.8	60.4
60.4	60.4
61.1	60.4
61.1	60.4
61.2	60.4
61.3	60.4
61.5	60.4
61.5	60.4
61.8	60.4
62.4	60.4
62.7	60.4
64.6	60.4
64.6	60.4
64.6	60.4
64.6	60.4
64.6	60.4
64.6	60.4
64.6	60.4
64.6	60.4
64.6	60.4
64.6	60.4
64.6	60.4
64.6	60.4
64.6	60.9
64.6	60.9
64.6	60.9
64.6	60.9
64.6	60.9
64.6	60.9
64.6	60.9
64.6	60.9
64.6	60.9
64.6	60.9
64.6	60.9
64.6	60.9
64.6	60.9
64.6	60.9
64.6	60.9
64.6	60.9
64.6	60.9
64.6	60.9
64.6	60.9
64.6	60.9
64.6	60.9
64.6	60.9
64.6	60.9
64.6	60.9
64.6	60.9
64.6	60.9
64.6	60.9
64.6	60.9
64.6	60.9
64.6	60.9
64.6	60.9
64.6	60.9
64.6	60.9
64.6	60.9
64.6	60.9
64.6	60.9
64.6	60.9
64.6	60.9
64.6	60.9
64.6	60.9
64.6	60.9
64.6	60.9
64.6	60.9
64.6	60.9
64.6	60.9
64.6	60.9
64.6	60.9
64.6	60.9
64.6	60.9
64.6	60.9
64.6	60.9
64.6	60.9
64.6	60.9
64.6	60.9
64.6	60.9
64.6	60.9
64.6	60.9
64.6	60.9
64.6	60.9
64.6	60.9
64.6	60.9
64.6	60.9
64.6	60.9
64.6	60.9
64.6	60.9
64.6	60.9
64.6	60.9
64.6	60.9
64.6	60.9
64.6	60.9
64.6	60.9
64.6	60.9
64.6	60.9
64.6	60.9
64.6	60.9
64.6	60.9
64.6	60.9
64.6	60.9
64.6	60.9
64.6	60.9
64.6	60.9
64.6	60.9
64.6	60.9
64.6	60.9
64.6	60.9
64.6	60.9
64.6	60.9
64.6	60.9
64.6	60.9
64.6	60.9
64.6	60.9
64.6	60.9
64.6	60.9
64.6	60.9
64.6	60.9
64.6	60.9
64.6	60.9
64.6	60.9
64.6	60.9
64.6	60.9
64.6	60.9
64.6	60.9
64.6	60.9
64.6	60.9
64.6	60.9
64.6	60.9
64.6	60.9
64.6	60.9
64.6	60.9
64.6	60.9
64.6	60.9
64.6	60.9
64.6	60.9
64.6	60.9
64.6	60.9
64.6	60.9
64.6	60.9
64.6	60.9
64.6	60.9
64.6	60.9
64.6	60.9
64.6	60.9
64.6	60.9
64.6	60.9
64.6	60.9
64.6	60.9
64.6	60.9
64.6	60.9
64.6	60.9
64.6	60.9
64.6	60.9
64.6	60.9
64.6	60.9
64.6	60.9
64.6	60.9
64.6	60.9
64.6	60.9
64.6	60.9
64.6	60.9
64.6	60.9
64.6	60.9
64.6	60.9
64.6	60.9
64.6	60.9
64.6	60.9
64.6	60.9
64.6	60.9
64.6	60.9
64.6	60.9
64.6	60.9
64.6	60.9
64.6	60.9
64.6	60.9
64.6	60.9
64.6	60.9
64.6	60.9
64.6	60.9
64.6	60.9
64.6	60.9
64.6	60.9
64.6	60.9
64.6	60.9
64.6	60.9
64.6	60.9
64.6	60.9
64.6	60.9
64.6	60.9
64.6	60.9
64.6	60.9
64.6	60.9
64.6	60.9
64.6	60.9
64.6	60.9
64.6	60.9
64.6	60.9
64.6	60.9
64.6	60.9
64.6	60.9
64.6	60.9
64.6	60.9
64.6	60.9
64.6	60.9
64.6	60.9
64.6	60.9
64.6	60.9
64.6	60.9
64.6	60.9
64.6	60.9
64.6	60.9
64.6	60.9
64.6	60.9
64.6	60.9
64.6	60.9
64.6	60.9
65.4	60.9
65.4	60.9
65.4	60.9
65.4	60.9
65.4	60.9
65.4	60.9
65.8	60.9
65.9	60.9
66.1	60.9
66.3	60.9
66.5	60.9
67	60.9
67.1	60.9
67.6	60.9
68.4	60.9
69	60.9
69	60.9
69	60.9
69	60.9
69	60.9
69	60.9
69.2	60.9
69.2	60.9
69.2	60.9
69.2	60.9
69.2	60.9
69.2	60.9
70.1	60.9
70.3	60.9
71.4	60.9
71.4	60.9
71.4	60.9
71.4	60.9
71.4	60.9
71.4	60.9
71.4	60.9
71.4	60.9
71.4	60.9
71.4	60.9
71.4	60.9
71.4	60.9
71.4	60.9
71.4	60.9
71.4	60.9
71.4	60.9
71.4	60.9
71.4	60.9
71.4	60.9
71.4	60.9
71.4	60.9
71.4	60.9
71.4	60.9
71.4	60.9
71.4	60.9
71.4	60.9
71.4	60.9
71.4	60.9
71.4	60.9
71.4	60.9
71.4	60.9
71.4	60.9
71.4	60.9
71.4	60.9
71.4	60.9
71.4	60.9
71.4	60.9
71.4	60.9
71.4	60.9
71.4	60.9
71.4	60.9
71.4	60.9
71.4	60.9
71.4	60.9
71.4	60.9
71.4	60.9
71.4	60.9
71.4	60.9
71.4	60.9
71.4	60.9
71.4	60.9
71.4	60.9
71.4	60.9
71.4	60.9
71.4	60.9
71.4	60.9
71.4	60.9
71.4	60.9
71.4	60.9
71.4	60.9
71.4	60.9
71.4	60.9
71.4	60.9
71.4	60.9
71.4	60.9
71.4	60.9
71.4	60.9
71.4	60.9
71.4	60.9
71.4	60.9
71.4	60.9
71.4	60.9
71.4	60.9
71.4	60.9
71.4	60.9
71.4	60.9
71.4	60.9
71.4	60.9
71.4	60.9
71.4	60.9
71.4	60.9
71.4	60.9
71.4	60.9
71.4	60.9
71.4	60.9
71.4	60.9
71.4	60.9
71.4	60.9
71.4	60.9
71.4	60.9
71.4	60.9
71.4	60.9
71.4	60.9
71.4	60.9
71.4	60.9
71.4	60.9
71.4	60.9
71.4	60.9
71.4	60.9
71.4	60.9
71.4	60.9
71.4	60.9
71.4	60.9
71.4	60.9
71.4	60.9
71.4	60.9
71.4	60.9
71.4	60.9
71.4	60.9
71.4	60.9
71.4	60.9
71.4	60.9
71.4	60.9
71.4	60.9
71.4	60.9
71.4	60.9
71.4	60.9
71.4	60.9
71.4	60.9
71.4	60.9
71.4	60.9
71.4	60.9
71.4	60.9
71.4	60.9
71.4	60.9
71.4	60.9
71.4	60.9
71.4	60.9
71.4	60.9
71.4	60.9
71.4	60.9
71.4	60.9
71.4	60.9
71.4	60.9
71.4	60.9
71.4	60.9
71.4	60.9
71.4	60.9
71.4	60.9
71.4	60.9
71.4	60.9
71.4	60.9
71.4	60.9
71.4	60.9
71.4	60.9
71.4	60.9
71.4	60.9
71.4	60.9
71.4	60.9
71.4	60.9
71.4	60.9
71.4	60.9
71.4	60.9
71.4	60.9
71.4	60.9
71.4	60.9
71.4	60.9
71.4	60.9
71.4	60.9
71.4	60.9
71.4	60.9
71.4	60.9
71.4	60.9
71.4	60.9
71.4	60.9
71.4	60.9
71.4	60.9
71.4	60.9
71.4	60.9
71.4	60.9
71.4	60.9
71.4	60.9
71.4	60.9
71.4	60.9
71.4	60.9
71.4	60.9
71.4	60.9
71.4	60.9
71.4	60.9
71.4	60.9
71.4	60.9
71.4	60.9
71.4	60.9
71.4	60.9
71.4	60.9
71.4	60.9
71.4	60.9
71.4	60.9
71.4	60.9
71.4	60.9
71.4	60.9
71.4	60.9
71.4	60.9
71.4	60.9
71.4	60.9
71.4	60.9
71.4	60.9
71.4	60.9
71.4	60.9
71.4	60.9
71.4	60.9
71.4	60.9
71.4	60.9
71.4	60.9
71.4	60.9
71.4	60.9
71.4	60.9
71.4	60.9
71.4	60.9
71.4	60.9
71.4	60.9
71.4	60.9
71.4	60.9
71.4	60.9
71.4	60.9
71.4	60.9
71.4	60.9
71.4	60.9
71.8	60.9
71.8	60.9
71.8	60.9
71.8	60.9
72.1	60.9
72.6	60.9
72.9	60.9
72.9	60.9
73.2	60.9
73.3	60.9
73.4	60.9
74.3	60.9
74.4	60.9
74.8	60.9
75.3	60.9
75.5	60.9
75.5	60.9
75.8	60.9
75.8	60.9
75.9	60.9
76	60.9
77.1	60.9
77.1	60.9
77.1	60.9
77.1	60.9
78.2	60.9
78.3	60.9
78.4	60.9
78.7	60.9
78.7	60.9
78.7	60.9
79.7	60.9
80.9	60.9
82	60.9
82	60.9
82	60.9
82	60.9
82	60.9
82	60.9
82	60.9
82	60.9
82	60.9
82	60.9
82	60.9
82	60.9
82	60.9
82	60.9
82	60.9
82	60.9
82	60.9
82	60.9
82	60.9
82	60.9
82	60.9
82	60.9
82	60.9
82	60.9
82	60.9
82	60.9
82	60.9
82	60.9
82	60.9
82	60.9
82	60.9
82	60.9
82	60.9
82	60.9
82	60.9
82	60.9
82	60.9
82	60.9
82	60.9
82	60.9
82	60.9
82	60.9
82	60.9
82	60.9
82	60.9
82	60.9
82	60.9
82	60.9
82	60.9
82	60.9
82	60.9
82	60.9
82	60.9
82	60.9
82	60.9
82	60.9
82	60.9
82	60.9
82	60.9
82	60.9
82	60.9
82	60.9
82	60.9
82	60.9
82	60.9
82	60.9
82	60.9
82	60.9
82	60.9
82	60.9
82	60.9
82	60.9
82	60.9
82	60.9
82	60.9
82	60.9
82	60.9
82	60.9
82	60.9
82	60.9
82	60.9
82	60.9
82	60.9
82	60.9
82	60.9
82	60.9
82	60.9
82	60.9
82	60.9
82	60.9
82	60.9
82	62.6
82	63.1
82	63.8
82	64.2
82	65.1
82	65.2
82	65.3
82	65.3
82	65.3
82	65.3
82	65.3
82	65.5
82	65.5
82	65.5
82	65.5
82	65.5
82	65.5
82	65.5
82	65.5
82	65.5
82	65.5
82	65.5
82	65.5
82	65.5
82	65.5
82	65.5
82	65.5
82	65.5
82	65.5
82	65.5
82	65.5
82	65.5
82	65.5
82	65.5
82	65.5
82	65.5
82	65.5
82	65.5
82	65.5
82	65.5
82	65.5
82	65.5
82	65.5
82	65.5
82	65.5
82	65.5
82	65.5
82	65.5
82	65.5
82	65.5
82	65.5
82	65.5
82	65.5
82	65.5
82	65.5
82	65.5
82	65.5
82	65.5
82	65.5
82	65.5
82	65.9
82	65.9
82	65.9
82	65.9
82	65.9
82	65.9
82	65.9
82	65.9
82	65.9
82	65.9
82	65.9
82	65.9
82	65.9
82	65.9
82	65.9
82	65.9
82	65.9
82	65.9
82	65.9
82	65.9
82	65.9
82	65.9
82	66.8
82	66.9
82	67
82	67.6
82	69.7
82	69.9
82	70.3
82	71.5
82	71.5
82	72.2
82	72.2
82.2	72.2
82.4	72.2
82.7	72.2
83.7	72.2
83.7	72.2
83.7	72.2
83.7	72.2
83.7	72.2
83.7	72.2
83.7	72.2
83.7	72.2
83.7	72.2
83.7	72.2
83.7	72.2
83.7	72.2
83.7	72.2
83.7	72.2
83.7	72.2
83.7	72.2
83.7	72.2
83.7	72.2
83.7	72.2
83.7	72.2
83.7	72.2
83.7	72.2
83.7	72.2
83.7	72.2
83.7	72.2
83.7	72.2
84	72.2
85.2	72.2
85.5	72.2
86.2	72.2
86.2	72.2
86.2	72.2
86.2	72.2
86.2	72.2
86.2	72.2
86.2	72.2
86.2	72.2
86.2	72.2
86.2	72.2
86.2	72.2
86.2	72.2
86.2	72.2
86.2	72.2
86.2	72.2
86.2	72.2
86.2	72.2
86.2	72.2
86.2	72.2
86.2	72.2
86.2	72.2
86.2	72.2
86.2	72.2
86.2	72.2
86.7	72.2
86.7	72.2
86.7	72.2
86.7	72.2
86.7	72.2
86.7	72.2
86.7	72.2
86.7	74.9
86.7	75.1
86.7	75.6
86.7	76.4
86.7	76.7
86.7	76.7
86.7	77.6
87	77.6
87	78.8
87	79.4
87	79.4
87	79.4
87	79.9
87	80.4
87	80.7
87	80.7
87	81
87	82.3
87	82.3
87	82.3
87	82.3
87	82.3
87	82.3
87	82.3
87	82.3
87	82.3
87	82.3
87	82.3
87	82.3
87	82.3
87	82.3
87	82.3
87	82.3
87	82.3
87	82.6
87	83.2
87	83.3
87	84.2
87	84.3
87	84.4
87	84.4
87	84.5
87	85.6
87	86.2
87	86.2
87	86.2
87	86.2
87	86.2
87	86.2
87	86.2
87	86.2
87	86.2
87	86.2
87	86.2
87	86.2
87	86.2
87.5	86.2
87.5	86.2
88.5	86.2
88.5	86.2
88.5	86.2
88.5	87
88.5	87
88.5	87.6
88.5	96.5
88.5
88.5
88.5
88.5
88.7
88.7
94.7

## Sheet: Fig 1e
Read Counts
6mer seed viability (%)	Read Counts
	Ctr	Tau tg
1	0	0
2	0	0
3	0	0
4	20.6362	39.2239
5	1.29933	37.2049
6	8.04873	12.1194
7	0	20.7193
8	6.19937	34.0521
9	2.20931	36.9306
10	4.93142	35.8424
11	3.17883	35.9573
12	19.4528	18.3289
13	10.6052	1385.51
14	39.5078	152.008
15	56.1068	53.7034
16	22.7014	146.079
17	284.155	351.052
18	193.363	344.869
19	90.4524	82.3518
20	35.2161	57.9091
21	81.9132	147.875
22	42.3178	28.1881
23	8.80051	31.4469
24	17.1181	149.387
25	533.06	1375.06
26	73.9868	278.637
27	83.8372	259.266
28	6.01139	80.3723
29	47.4858	81.161
30	16.1776	8.6751
31	44.3409	65.9334
32	15.379	124.282
33	141.555	255.325
34	64.1004	113.971
35	3.71415	58.3283
36	29.7994	132.541
37	43.1007	96.15
38	73.0658	317.485
39	33.8651	41.6958
40	155.461	185.383
41	10.598	39.8396
42	40.3892	57.3649
43	193.803	354.648
44	38.4914	24.5218
45	45.8146	14.7717
46	20.4091	90.8075
47	52.2639	146.652
48	58.0946	114.124
49	40.6689	60.6989
50	166.667	613.933
51	96.363	113.521
52	688.939	258.315
53	39.7432	233.381
54	26.076	245.529
55	83.0385	249.681
56	36.1319	89.2141
57	132.797	243.173
58	135.443	319.001
59	26.8855	103.892
60	1217.07	2129.27
61	18720.1	29889.8
62	46.1196	132.805
63	130.932	133.181
64	6004.43	9718.75
65	1019.26	465.797
66	155.511	184.001
67	125.248	246.355
68	129.89	267.814
69	29.4524	40.0617
70	129.73	221.155
71	1183.48	513.304
72	115.851	1086.53
73	98.4444	111.244
74	120.741	340.251
75	97.68	159.594
76	189.975	514.841
77	101.47	140.947
78	136.235	327.477
79	95.5218	157.655
80	86.2351	415.503
81	61.736	212.14
82	1547.59	756.34
83	439.407	798.316
84	2602.43	183.863
85	2.32258	10.0404
86	94.4267	322.306
87	114.062	372.091
88	73.7221	54.877
89	42.153	20.7559
90	29.1193	4.72639
91	0.833743	46.8782
92	7.5414	4.60795
93	0.382007	9.21467
94	26.3171	14.9027
95	68.7919	99.2123
96	15.0426	2.50214
97	1.22593	28.4573
98	0	0
99	8.3738	0
100	0	5.63438
101	0	0
102	0	0
103	0	0
104	0	0
105	0	0
106	0	0
107	0	0
108	0	0
109	0	0
110	0	0
111	0	0
112	0	0
113	0	0
114	0	0
115	0	0
116	0	0
117	0	0
118	0	0
119	0	0
120	0	0

## Sheet: Fig 1e insert
Seed viability (%)
Lo in Tau tg	Hi in Tau tg
4.5	4.4
4.5	5.1
10.4	6.6
12.3	9.3
12.3	10.4
13	11.3
13.9	13
13.9	13
14.6	13
14.6	13
14.6	13
14.6	13
15	13
16.8	13
16.8	13
16.8	13
16.8	13
17.2	13
17.2	13
17.3	13
17.3	13
18.1	13
18.1	13
18.1	13
18.1	13
18.1	13
18.1	13
18.1	13
18.1	13
18.1	13
18.1	13
18.1	13
19	13
19.3	13
19.3	13
19.3	13
19.3	13
19.5	13
20.8	13
20.8	13
20.8	13
20.8	13
21	13
21.1	13
21.2	13
21.5	13
21.5	13
22.5	13
22.5	13
22.8	13
24.5	13
24.8	13
24.8	13.6
24.8	14.3
24.8	14.3
24.8	14.3
24.8	14.8
24.8	15.7
25.1	16.2
25.3	16.2
25.3	16.2
25.4	17.3
25.4	17.3
25.4	17.3
25.6	17.3
25.8	17.9
25.8	18.3
28.1	18.3
28.7	18.3
28.9	18.3
29.4	18.3
29.4	18.3
30.5	18.3
30.5	19.3
30.6	20.7
31.2	20.7
31.2	20.7
31.5	21.4
32.6	23.1
32.6	23.8
32.7	24
33.6	24.2
33.8	24.3
34.3	24.5
34.3	24.6
35.6	25.1
36.1	25.1
37.2	25.1
37.2	25.1
38.1	25.1
38.1	25.1
39.1	25.1
39.1	25.1
39.6	25.1
39.6	25.1
39.6	25.1
39.7	25.1
39.7	25.1
39.8	25.1
40	25.1
40	25.1
40.4	25.1
40.4	25.1
40.4	25.1
40.4	25.1
40.8	25.1
42.4	25.1
42.4	25.1
42.6	25.1
42.7	25.1
42.8	25.1
42.9	25.1
42.9	25.1
43	25.1
43	25.1
44.3	25.1
44.4	25.7
44.4	25.7
44.4	25.7
44.8	26.2
44.8	26.2
44.8	26.2
44.8	26.3
46.8	26.4
47.4	26.9
47.4	26.9
47.7	26.9
48	26.9
48	27.2
48.2	27.5
48.8	27.7
48.8	28.5
48.9	28.9
48.9	29
49.2	30.9
49.7	31.8
49.9	31.8
50.3	32.4
50.6	33.2
50.6	33.4
50.7	33.4
50.7	33.4
51.2	33.9
51.2	34.5
51.3	35.1
51.3	35.5
51.5	35.7
51.5	35.7
52	36
52	36.6
52.2	37.3
52.5	37.8
52.5	37.8
52.5	37.8
52.5	38.4
52.5	38.5
52.5	38.5
52.5	38.5
52.5	39.1
52.5	40.2
52.5	40.2
52.5	40.2
52.5	41.4
52.5	42.1
52.5	43
52.5	43
52.5	43
52.5	43
52.5	43
52.5	43
52.5	43.4
52.5	46.4
52.5	46.4
52.5	46.9
52.5	46.9
52.5	46.9
52.5	47.4
52.5	47.8
52.5	48
52.5	48.1
52.5	49.3
52.5	49.5
52.5	50.2
52.5	50.3
52.5	50.3
52.5	50.3
52.5	50.3
52.5	50.3
52.5	50.3
52.5	50.3
52.5	50.3
52.5	50.3
52.5	50.3
52.5	50.3
52.5	50.3
52.5	50.3
52.5	51.3
52.5	51.4
52.5	51.5
52.5	51.9
52.5	52.1
52.5	53
52.5	53
52.5	53
52.5	53
52.5	53.1
52.5	53.1
52.5	53.7
52.6	53.7
53.8	53.8
55	54.2
55	54.3
55.2	54.3
55.2	54.3
55.3	54.4
55.6	54.5
55.6	54.6
56	54.6
56.7	54.7
57.1	54.9
57.1	55.2
57.7	55.2
57.7	55.4
57.8	55.5
57.8	55.6
58.2	56.5
58.9	56.7
59.8	57
59.8	57.3
59.8	57.3
60.3	57.3
60.3	57.9
60.5	57.9
61.4	57.9
61.4	57.9
61.7	57.9
61.9	57.9
62.5	57.9
62.5	59
62.6	59.2
62.6	59.2
62.8	59.5
63	59.7
63	59.8
63	60.2
63	60.2
63.2	60.2
63.4	60.4
63.9	60.4
64.3	60.4
64.6	60.4
64.6	60.4
64.6	60.4
64.6	60.4
64.6	60.4
64.6	60.4
64.6	60.4
64.6	60.4
64.6	60.4
64.6	60.4
64.6	60.4
64.6	60.4
64.6	60.4
64.6	60.4
64.6	60.4
64.6	60.4
64.6	60.4
64.6	60.4
64.6	60.4
64.6	60.4
64.6	60.4
64.6	60.4
64.6	60.8
64.6	60.9
64.6	60.9
64.6	60.9
64.6	60.9
64.6	60.9
64.6	60.9
64.6	60.9
64.6	60.9
64.6	60.9
64.6	60.9
64.6	60.9
64.6	60.9
64.6	60.9
64.6	60.9
64.6	60.9
64.6	60.9
64.6	60.9
64.6	60.9
64.6	60.9
64.6	60.9
64.6	60.9
64.6	60.9
64.6	60.9
64.6	60.9
64.6	60.9
64.6	60.9
64.6	60.9
64.6	60.9
64.6	60.9
64.6	60.9
64.6	60.9
64.6	60.9
64.6	60.9
64.6	60.9
64.6	60.9
64.6	60.9
64.6	60.9
64.6	60.9
64.6	60.9
64.6	60.9
64.6	60.9
64.6	60.9
64.6	60.9
64.6	60.9
64.6	60.9
64.6	60.9
64.6	60.9
64.6	60.9
64.6	60.9
64.6	60.9
64.6	60.9
64.6	60.9
64.6	60.9
64.6	60.9
64.6	60.9
64.6	60.9
64.6	60.9
64.6	60.9
64.6	60.9
64.6	60.9
64.6	60.9
64.6	60.9
64.6	60.9
64.6	60.9
64.7	60.9
64.7	60.9
64.7	60.9
65.4	60.9
65.6	60.9
65.8	60.9
65.9	60.9
65.9	60.9
65.9	60.9
66.2	60.9
66.2	60.9
66.2	60.9
66.2	60.9
66.2	60.9
66.2	60.9
66.4	60.9
67.1	60.9
67.1	60.9
67.2	60.9
67.2	60.9
67.3	60.9
67.6	60.9
67.6	60.9
68.1	60.9
68.1	60.9
68.1	60.9
68.3	60.9
68.3	60.9
68.3	60.9
68.4	60.9
68.5	60.9
68.8	60.9
69	60.9
69.6	60.9
69.7	60.9
69.9	60.9
69.9	60.9
70.1	60.9
70.3	60.9
70.3	60.9
70.3	60.9
70.3	60.9
70.3	60.9
70.3	60.9
70.5	60.9
70.8	60.9
70.8	60.9
70.8	60.9
71.2	60.9
71.2	60.9
71.2	60.9
71.2	60.9
71.4	60.9
71.4	60.9
71.4	60.9
71.4	60.9
71.4	60.9
71.4	60.9
71.4	60.9
71.4	60.9
71.4	60.9
71.4	60.9
71.4	60.9
71.4	60.9
71.4	60.9
71.4	60.9
71.4	60.9
71.4	60.9
71.4	60.9
71.4	60.9
71.4	60.9
71.4	60.9
71.4	60.9
71.4	60.9
71.4	60.9
71.4	60.9
71.4	60.9
71.4	60.9
71.4	60.9
71.4	60.9
71.4	60.9
71.4	60.9
71.4	60.9
71.4	60.9
71.4	60.9
71.4	60.9
71.4	60.9
71.4	60.9
71.4	60.9
71.4	60.9
71.4	60.9
71.4	60.9
71.4	60.9
71.4	60.9
71.4	60.9
71.4	60.9
71.4	60.9
71.4	60.9
71.4	60.9
71.4	60.9
71.4	60.9
71.4	60.9
71.4	60.9
71.4	60.9
71.4	60.9
71.4	60.9
71.4	60.9
71.4	60.9
71.4	60.9
71.4	60.9
71.4	60.9
71.4	60.9
71.4	60.9
71.4	60.9
71.4	60.9
71.4	60.9
71.4	60.9
71.4	60.9
71.4	60.9
71.4	60.9
71.4	60.9
71.4	60.9
71.4	60.9
71.4	60.9
71.4	60.9
71.4	60.9
71.4	60.9
71.4	60.9
71.4	60.9
71.4	60.9
71.4	60.9
71.4	60.9
71.4	60.9
71.4	60.9
71.4	60.9
71.4	60.9
71.4	60.9
71.4	60.9
71.4	60.9
71.4	60.9
71.4	60.9
71.4	60.9
71.7	60.9
71.9	60.9
72.1	60.9
72.2	60.9
72.6	60.9
72.7	60.9
72.9	60.9
73.1	60.9
73.1	60.9
73.1	60.9
73.5	60.9
74.2	60.9
74.2	60.9
74.2	60.9
74.2	60.9
74.3	60.9
74.4	60.9
74.5	60.9
74.5	60.9
74.5	60.9
74.7	60.9
74.7	60.9
75.1	60.9
75.1	60.9
75.3	60.9
75.3	60.9
75.4	60.9
75.8	60.9
75.8	60.9
76	60.9
76.4	60.9
76.4	60.9
76.4	60.9
76.5	60.9
76.5	60.9
76.7	60.9
76.7	60.9
76.8	60.9
76.8	60.9
76.9	60.9
77.2	60.9
77.2	60.9
77.6	60.9
77.6	60.9
77.8	60.9
77.8	60.9
78	60.9
78	60.9
78.3	60.9
78.4	60.9
78.4	60.9
78.8	60.9
79	60.9
79	60.9
79.1	60.9
79.1	60.9
79.2	60.9
79.4	60.9
79.4	60.9
79.7	60.9
79.8	60.9
79.9	60.9
79.9	60.9
80.2	60.9
80.9	60.9
81.9	60.9
82	60.9
82	60.9
82	60.9
82	60.9
82	60.9
82	60.9
82	60.9
82	60.9
82	60.9
82	60.9
82	60.9
82	60.9
82	60.9
82	60.9
82	60.9
82	60.9
82	60.9
82	60.9
82	60.9
82	60.9
82	60.9
82	60.9
82	60.9
82	60.9
82	60.9
82	60.9
82	60.9
82	60.9
82	60.9
82	60.9
82	60.9
82	60.9
82	60.9
82	60.9
82	60.9
82	60.9
82	60.9
82	60.9
82	60.9
82	60.9
82	60.9
82	60.9
82	60.9
82	60.9
82	60.9
82	60.9
82	60.9
82	60.9
82	60.9
82	60.9
82	60.9
82	60.9
82	60.9
82	60.9
82	60.9
82	60.9
82	60.9
82	60.9
82	60.9
82	60.9
82	60.9
82	60.9
82	60.9
82	60.9
82	60.9
82	60.9
82	60.9
82	60.9
82	60.9
82	60.9
82	60.9
82	60.9
82	60.9
82	60.9
82	60.9
82	60.9
82	60.9
82	60.9
82	60.9
82	60.9
82	60.9
82	60.9
82	60.9
82	60.9
82	60.9
82	60.9
82	60.9
82	60.9
82	60.9
82	60.9
82	60.9
82	60.9
82	60.9
82	60.9
82	60.9
82	60.9
82	60.9
82	60.9
82	60.9
82	61.1
82	61.1
82	61.3
82	61.4
82	61.8
82	62.4
82	62.4
82	62.7
82	62.7
82	63.7
82	63.7
82	63.7
82	63.7
82	63.7
82	63.7
82	63.7
82	63.7
82	63.7
82	63.7
82	63.7
82	63.7
82	63.7
82	63.7
82	63.7
82	63.7
82	63.7
82	63.7
82	63.7
82	63.7
82	63.7
82.2	63.7
82.7	63.7
82.7	63.7
83	63.7
83	63.7
83.5	63.7
83.7	63.7
83.7	63.7
83.7	63.7
83.7	63.7
83.7	63.7
83.7	63.7
83.7	63.7
83.7	63.7
83.7	63.7
83.7	63.7
83.7	63.7
83.7	63.7
83.7	63.7
83.7	63.7
83.7	63.7
83.7	63.7
83.7	63.7
83.7	63.7
83.7	63.7
83.7	63.7
83.7	63.7
83.7	63.7
83.7	63.7
83.7	63.7
83.7	63.7
83.7	63.7
83.7	63.7
83.7	63.7
83.7	63.7
83.7	63.7
83.7	63.7
83.7	63.7
83.7	63.7
83.7	63.7
83.7	63.7
83.7	63.7
83.7	63.7
83.7	63.7
83.7	63.7
83.7	63.7
83.7	63.7
83.7	63.7
83.7	63.7
83.7	63.7
83.7	63.7
83.7	63.7
83.7	63.7
83.7	63.7
83.7	63.7
83.7	63.7
83.7	63.7
83.7	63.7
83.7	63.7
83.7	63.7
83.7	63.7
83.7	63.7
83.7	63.7
83.7	63.7
83.7	63.7
83.7	63.7
83.7	63.7
83.7	63.7
83.7	63.7
83.7	63.7
83.7	63.7
83.7	63.7
83.7	63.7
83.7	63.7
83.7	63.7
83.7	63.7
83.7	63.7
83.7	63.7
83.7	63.7
83.7	63.7
83.7	63.7
83.7	63.7
83.7	63.7
83.7	63.7
83.7	63.7
83.7	63.7
83.7	63.7
83.7	63.7
83.7	63.7
83.7	63.7
83.7	63.7
83.7	63.7
83.7	63.7
83.7	63.7
83.7	63.7
83.7	63.7
83.7	63.7
83.7	63.7
83.7	63.7
83.7	63.7
83.7	63.7
83.7	63.8
83.7	63.8
83.7	64
83.7	64.1
83.7	64.3
83.7	65.1
83.7	65.1
83.7	65.1
83.7	65.1
83.7	65.2
83.7	65.4
83.7	65.4
83.7	65.5
83.7	65.5
83.7	65.9
83.7	66.8
83.7	67
83.7	67
83.7	67
83.7	67.4
83.7	67.6
83.7	67.9
83.7	68
83.7	68.2
83.7	68.4
83.7	68.4
83.7	68.4
83.7	69.7
83.7	69.9
83.7	70
83.7	70.2
83.7	70.2
83.7	70.4
83.7	70.8
83.7	70.9
83.7	70.9
83.7	70.9
83.7	71.1
83.7	71.3
83.7	71.7
83.7	71.8
83.7	71.8
83.7	71.8
83.7	71.8
83.7	71.8
83.7	71.8
83.7	71.8
83.7	71.8
83.7	71.8
83.7	71.8
83.7	71.8
83.7	71.8
83.7	71.8
83.7	71.8
83.7	71.8
83.7	71.8
83.7	71.8
83.7	71.8
83.7	71.8
83.7	71.8
83.7	71.8
83.7	71.8
83.7	71.8
83.7	71.8
83.7	71.8
83.7	71.8
83.7	71.8
83.7	71.8
83.7	72.2
83.7	72.2
83.7	72.2
83.7	72.4
83.7	72.7
83.7	73
83.7	73.2
83.7	73.5
83.7	73.6
83.7	73.7
83.7	73.7
83.7	73.8
83.7	73.9
83.7	73.9
83.7	73.9
83.7	73.9
83.7	73.9
83.7	74.4
83.7	74.7
83.7	74.8
83.7	74.8
83.7	75.1
83.7	75.4
83.7	75.6
83.7	75.6
83.7	75.6
83.7	75.6
83.7	75.7
83.7	75.7
83.7	75.8
83.7	76.1
83.7	76.1
83.7	76.1
83.7	76.2
83.7	76.4
83.7	76.4
83.7	76.5
83.7	76.7
83.7	77.1
83.7	77.2
83.7	77.5
83.7	77.6
83.7	77.6
83.7	77.6
83.7	77.6
83.7	78
83.7	78
83.7	78.3
83.7	78.3
83.7	78.8
83.7	78.8
83.7	79
83.7	79.2
83.7	79.4
83.7	79.5
83.7	79.6
83.7	79.7
83.7	79.9
83.7	80.4
83.7	80.4
83.7	80.4
83.7	80.4
83.7	80.4
83.7	80.4
83.7	80.4
83.7	80.4
83.7	80.7
83.7	80.8
83.7	80.8
83.7	81.3
83.7	81.3
83.7	81.5
83.7	81.5
83.7	81.9
83.7	82.3
83.7	82.3
83.7	82.3
83.7	82.3
83.7	82.3
83.7	82.3
83.7	82.3
83.7	82.3
83.7	82.3
83.7	82.6
83.7	83.2
83.7	83.3
83.7	83.4
83.7	83.4
83.7	83.4
83.7	83.4
83.7	83.4
83.7	83.4
83.7	83.4
83.7	83.4
83.7	83.4
83.7	83.4
83.7	83.4
83.7	83.5
83.7	84.4
83.7	84.4
83.7	84.4
83.7	86.1
83.7	86.2
83.7	86.2
83.7	86.2
83.7	86.2
83.7	86.2
83.7	86.2
83.7	86.2
83.7	86.7
83.7	86.7
83.7	86.7
83.7	86.7
83.7	86.7
83.7	86.7
83.7	86.7
83.7	86.7
83.7	86.7
83.7	88.4
83.7	89
83.7	90.7
83.7	94.7
83.7	94.7
83.7	97
83.7
84.3
85.5
85.5
85.6
87
87
87.2
87.2
87.7
87.7
87.7
87.7
88.1
88.7
88.7
88.7
88.8
88.8
89.6
90.3
90.4
94.3
94.3
95
95
95
96.5
98.9

## Sheet: Fig 2d
6mer seed viability(%)	Read Counts
	iPSCs.AD.rep1	iPSCs.AD.rep2	iPSCs.Control.rep1	iPSCs.Control.rep2	Ave.Ctr iPSC	Ave.AD iPSC
1	0	0	0	0	0	0
2	0	0	0	0	0	0
3	0	0	0	0	0	0
4	46.222	10.092	11.211	69.964	40.5875	28.157
5	86.666	40.369	295.224	125.935	210.579	63.5175
6	109.777	35.322	18.685	41.979	30.332	72.5495
7	219.554	257.351	127.058	153.922	140.49	238.452
8	52	151.381	246.642	195.898	221.27	101.691
9	161.774	222.027	56.055	67.966	62.0105	191.9
10	1947.1	418.822	721.243	757.605	739.424	1182.96
11	1063.1	888.111	919.306	1879.02	1399.16	975.608
12	167.553	141.29	78.477	85.957	82.217	154.421
13	127.11	211.935	71.003	77.96	74.4815	169.523
14	259.998	156.427	246.642	321.835	284.238	208.212
15	127.111	121.105	104.636	119.939	112.287	124.108
16	2201.32	3148.76	3482.9	2600.64	3041.77	2675.04
17	144.444	70.644	82.214	89.954	86.084	107.544
18	1710.21	196.797	250.38	223.885	237.132	953.505
19	127.111	100.92	112.11	113.943	113.026	114.016
20	1045.77	1251.43	452.177	269.862	361.019	1148.6
21	1588.88	484.422	724.978	693.642	709.31	1036.65
22	10607.9	2719.84	4592.79	7030.32	5811.56	6663.89
23	756.885	1483.55	362.489	263.866	313.178	1120.22
24	6176.4	7786.12	8916.52	8079.78	8498.15	6981.26
25	4986.19	1539.06	4544.21	7753.94	6149.08	3262.62
26	20667	14643.8	8004.69	11476	9740.34	17655.4
27	410.221	327.997	291.487	355.817	323.652	369.109
28	1403.99	2608.83	343.804	321.832	332.818	2006.41
29	2131.99	201.843	351.278	219.887	285.582	1166.91
30	959.107	1019.31	781.036	817.575	799.305	989.207
31	1305.77	3173.99	848.301	791.59	819.946	2239.88
32	294.666	201.842	239.168	241.875	240.522	248.254
33	306.218	494.515	351.278	589.691	470.485	400.366
34	3547.53	4975.45	3699.64	4451.67	4075.66	4261.49
35	4882.19	10147.7	10407.6	7759.94	9083.77	7514.94
36	4027.08	2391.84	6775.21	6204.76	6489.98	3209.46
37	433.331	368.362	179.376	189.903	184.639	400.846
38	883.996	2346.43	795.982	731.623	763.803	1615.21
39	525.772	671.127	691.347	707.631	699.489	598.449
40	1357.77	1180.78	743.663	527.729	635.696	1269.27
41	2051.09	4612.13	949.2	617.682	783.441	3331.61
42	1028.44	655.989	807.194	1007.48	907.337	842.214
43	1455.99	1185.83	680.134	969.499	824.817	1320.91
44	1900.88	1211.06	1169.68	1219.37	1194.53	1555.97
45	1871.99	1539.06	1300.48	2718.58	2009.53	1705.52
46	25520.3	650.94	1038.89	869.551	954.22	13085.6
47	1178.66	837.648	911.831	1059.45	985.641	1008.15
48	3535.98	565.158	579.235	689.646	634.44	2050.57
49	3420.42	18872.4	1651.76	1429.26	1540.51	11146.4
50	1733.32	2558.36	2772.86	2486.7	2629.78	2145.84
51	693.332	242.21	508.233	519.73	513.981	467.771
52	4385.3	1665.21	1969.4	2176.87	2073.14	3025.25
53	791.549	1059.67	272.801	253.869	263.335	925.611
54	1796.87	2215.23	2488.85	2134.89	2311.87	2006.05
55	11867.5	22132.2	13120.7	9836.85	11478.8	16999.8
56	1617.77	1685.39	2294.53	1795.07	2044.8	1651.58
57	61729.4	115788	136887	105457	121172	88758.5
58	4876.41	9204.07	6969.54	11895.8	9432.66	7040.24
59	3102.64	2109.26	3550.16	3528.16	3539.16	2605.95
60	2420.87	1957.88	2387.95	3128.37	2758.16	2189.37
61	2813.76	2104.21	1954.46	2100.91	2027.68	2458.99
62	16876.8	27612.2	20392.9	20821.1	20607	22244.5
63	40530.9	41721.1	33793.9	69113.8	51453.8	41126
64	1692.88	837.645	1793.77	1265.34	1529.55	1265.26
65	1172.88	2023.48	825.88	1051.45	938.667	1598.18
66	25786.1	35014.8	24410.2	24093.4	24251.8	30400.4
67	76075.5	112846	92726.6	99895.7	96311.2	94460.7
68	130929	62869.3	92199.7	86188.9	89194.3	96899.3
69	2530.65	2058.8	2242.21	2112.9	2177.55	2294.72
70	2571.09	3567.58	3950.02	3422.22	3686.12	3069.34
71	39964.6	60845.8	61081.6	53939.8	57510.7	50405.2
72	92484.3	77331.4	136360	123523	129942	84907.8
73	24647.8	44314.8	45423.4	35371.5	40397.5	34481.3
74	5072.86	7271.41	4319.98	6496.61	5408.3	6172.13
75	14629.2	28333.8	22037.2	21388.8	21713	21481.5
76	4408.41	3517.11	4035.97	3897.97	3966.97	3962.76
77	16535.9	11141.8	14574.4	16447.4	15510.9	13838.8
78	11428.4	13680	7649.67	12195.6	9922.65	12554.2
79	3050.64	3138.66	3624.9	2804.54	3214.72	3094.65
80	36890.9	15688.3	12556.4	12645.4	12600.9	26289.6
81	8868.83	5666.76	4028.5	4837.48	4432.99	7267.79
82	3836.42	3052.88	4230.3	5423.17	4826.74	3444.65
83	35186.4	36987.9	40042.1	51870.8	45956.5	36087.2
84	72874.7	23015.2	15725.4	13572.9	14649.1	47944.9
85	6471.07	4127.69	7130.23	5880.93	6505.58	5299.38
86	5223.07	6267.24	6644.41	4545.63	5595.02	5745.16
87	5275.08	8023.28	6692.99	5948.89	6320.94	6649.18
88	2958.2	1655.11	2208.57	2588.65	2398.61	2306.66
89	5852.85	8548.07	6644.41	8119.76	7382.09	7200.46
90	14484.8	6983.78	7679.56	6596.56	7138.06	10734.3
91	26311.8	15531.9	11633.3	11641.9	11637.6	20921.9
92	595.109	494.512	560.551	575.7	568.126	544.811
93	2732.87	2997.37	5145.87	5371.19	5258.53	2865.12
94	2264.87	2613.87	2361.79	2786.55	2574.17	2439.37
95	4541.3	4208.44	6902.27	5834.94	6368.61	4374.87
96	1063.11	1155.55	1240.69	1431.26	1335.97	1109.33
97	283.11	368.362	291.487	219.887	255.687	325.736
98	4639.52	1695.48	2260.89	2780.55	2520.72	3167.5
99	190.666	539.931	336.331	337.824	337.077	365.298
100	3663.08	8134.3	2559.86	3090.38	2825.12	5898.69
101	8048.39	16904.4	10127.3	11482	10804.7	12476.4
102	16015.9	24619.9	23315.3	22874	23094.6	20317.9
103	28.889	40.368	11.211	33.983	22.597	34.6285
104	46.222	75.69	67.266	59.969	63.6175	60.956
105	387.109	469.286	1300.48	1305.32	1302.9	428.197
106	17.333	45.414	14.948	29.985	22.4665	31.3735
107	0	0	0	0	0	0
108	0	0	0	0	0	0
109	40.444	65.598	48.581	43.978	46.2795	53.021
110	0	5.046	3.737	7.996	5.8665	2.523
111	0	0	0	0	0	0
112	0	0	0	0	0	0
113	0	0	0	0	0	0
114	0	0	0	0	0	0
115	0	0	0	0	0	0
116	0	0	0	0	0	0
117	0	0	0	0	0	0
118	0	0	0	0	0	0
119	0	0	0	0	0	0
120	0	0	0	0	0	0

## Sheet: Fig 2e
Seed viability (%)
Lo in AD iPSC	Hi in AD iPSC
5	18.1
5	18.1
5	18.1
5	18.1
5	19.7
5	19.7
5	19.7
5	19.7
5	20.5
5	20.6
5	20.9
7.3	20.9
8.2	23.1
8.5	23.1
8.5	23.3
8.5	23.3
9.7	23.3
9.7	23.3
11.1	25.8
11.1	25.8
11.1	25.8
11.1	25.8
11.1	25.8
12.8	25.8
14.1	25.8
14.1	25.8
14.1	25.8
14.1	25.8
14.1	25.8
14.1	25.8
16.2	25.8
16.2	25.8
16.2	25.8
16.2	25.8
16.2	25.8
16.2	25.8
16.2	25.8
16.2	25.8
16.2	25.8
16.2	25.8
16.2	25.8
16.2	25.8
16.2	25.8
16.2	25.8
16.2	25.8
16.2	25.8
16.2	25.8
16.2	25.8
16.2	25.8
17.3	25.8
17.3	25.8
17.4	25.8
18.8	25.8
18.8	25.8
19.1	26.2
19.1	26.2
19.2	26.2
19.9	26.2
20.9	26.2
20.9	26.2
21.6	26.2
23	26.2
23.4	26.2
23.5	28.2
23.5	28.2
23.6	28.2
23.6	28.2
24.3	28.2
24.3	28.2
24.3	28.2
24.3	28.2
24.3	28.2
24.3	28.2
24.3	29.1
24.4	29.1
24.5	29.1
25.4	29.2
25.4	29.2
25.4	30.3
25.4	30.3
25.4	30.3
25.4	30.6
25.4	31
26.6	31
29	31
29.7	31
29.7	31
29.7	31
29.7	31
30.1	37.2
30.8	37.9
30.9	37.9
30.9	37.9
32.5	37.9
33.1	37.9
33.4	37.9
33.4	37.9
34.6	39.7
35.2	39.7
35.2	39.7
35.2	39.7
35.2	41.3
35.2	41.3
35.2	41.3
35.5	41.3
35.8	41.3
35.8	41.3
35.8	41.3
35.8	41.3
35.8	41.3
35.8	41.3
35.8	41.3
35.8	41.3
35.8	41.3
35.8	43
35.8	43.8
35.8	44
35.8	44.6
35.8	44.8
35.8	46.3
35.8	46.3
35.8	46.3
35.8	46.3
35.8	46.3
35.8	46.3
35.8	46.3
35.8	46.3
35.8	46.3
35.8	46.3
35.8	46.3
35.8	46.3
35.8	46.3
35.8	46.3
35.8	46.3
35.8	46.3
36.7	46.3
37.8	46.3
37.8	46.3
37.8	46.3
38.5	46.3
38.5	46.3
38.5	46.3
38.5	46.3
39	46.3
39	46.3
39.2	46.3
39.2	46.3
40.3	46.3
40.3	46.3
40.3	46.3
40.4	46.3
40.8	46.3
40.8	46.3
41.4	46.3
41.4	46.3
41.5	46.3
41.6	46.3
42.3	46.3
42.5	46.3
42.9	46.3
43.1	46.3
43.1	46.3
43.5	46.3
44	46.3
44.1	46.3
44.4	46.3
44.5	46.3
44.5	46.3
44.5	46.3
44.5	46.3
44.5	46.3
44.5	46.3
46	46.3
46	46.3
46	46.3
46	46.3
46	46.3
46	46.3
46	46.3
46.2	46.3
46.7	46.3
46.7	46.3
46.9	46.3
46.9	46.3
46.9	46.3
47.9	46.3
48.3	46.3
48.4	46.3
48.7	46.3
48.7	46.3
48.8	46.3
50.1	46.3
50.1	46.3
50.1	46.3
50.1	46.3
50.1	46.3
50.1	46.3
50.1	46.3
50.1	46.3
50.7	46.3
51	48.3
51	48.3
51.4	48.3
51.7	48.3
52.1	48.3
52.1	48.3
52.2	48.3
52.6	48.5
53.5	48.5
53.5	48.6
53.5	49.2
53.5	49.2
53.5	49.2
53.5	49.2
53.5	49.2
53.5	49.2
53.5	49.2
53.5	49.2
53.5	49.2
53.8	49.2
53.9	49.2
53.9	49.2
53.9	49.2
54.2	49.2
54.4	49.2
54.4	49.2
54.4	49.2
54.4	49.2
54.4	49.2
54.4	49.2
54.4	49.2
54.4	49.2
54.4	49.2
54.4	49.2
54.4	49.2
54.4	49.2
54.4	49.2
54.4	49.2
54.4	49.2
54.4	49.2
54.4	49.2
54.4	49.2
54.4	49.2
54.4	49.2
55.7	49.2
55.7	49.2
55.7	49.2
55.7	49.2
55.7	49.2
55.7	49.2
55.7	49.2
55.7	49.2
56.2	49.2
56.7	49.2
56.7	49.2
56.7	49.2
56.7	49.2
56.9	49.2
56.9	49.2
56.9	49.2
56.9	49.2
56.9	49.2
56.9	49.2
56.9	49.2
56.9	49.2
56.9	49.2
56.9	49.2
56.9	49.2
56.9	49.2
56.9	49.2
56.9	49.2
56.9	49.2
56.9	49.2
56.9	51.4
56.9	51.5
56.9	51.5
56.9	51.5
56.9	51.5
56.9	52.4
56.9	52.4
56.9	52.4
56.9	53.1
56.9	53.1
57.1	55.1
57.1	55.1
57.1	55.1
57.1	55.1
57.1	55.1
57.2	55.1
57.4	55.1
57.5	55.1
57.5	55.1
57.5	55.1
57.5	55.1
57.5	55.1
57.5	55.1
57.5	55.1
57.5	55.1
57.5	55.1
57.5	55.1
57.5	55.1
57.5	55.1
57.5	55.1
57.5	55.1
57.5	55.1
57.5	55.1
57.5	55.1
57.5	55.1
57.5	55.1
57.5	55.1
57.5	55.1
57.5	55.1
57.5	55.1
58.4	55.1
58.9	55.1
59.2	55.1
59.7	55.1
59.7	55.1
60.3	55.1
60.4	55.1
60.6	55.1
60.6	56
60.6	57
60.6	61.3
60.6	61.7
60.6	61.7
60.6	61.7
60.6	61.7
60.9	61.7
60.9	61.7
60.9	61.7
61.3	61.7
61.3	61.7
61.3	61.7
61.4	61.7
61.5	61.7
61.5	61.7
61.5	61.7
61.5	61.7
61.5	61.7
61.5	61.7
62.7	61.7
62.7	61.7
62.7	61.7
62.9	61.7
62.9	61.7
62.9	61.7
63	61.7
63.1	61.7
63.1	61.7
63.1	61.7
63.1	61.7
63.1	61.7
63.1	61.7
63.1	61.7
63.1	61.7
63.1	61.7
63.1	61.7
63.1	61.7
63.1	61.7
63.1	61.7
63.1	61.7
63.1	61.7
63.1	61.7
63.1	61.7
63.1	65.2
63.1	65.3
63.2	65.3
63.2	65.3
63.2	65.6
63.2	65.6
63.2	65.6
63.2	65.6
63.2	65.6
63.2	65.6
63.2	65.6
63.2	65.6
63.2	65.6
63.2	65.6
63.2	65.6
63.2	65.6
63.2	65.6
63.2	65.6
63.2	65.6
63.2	65.6
63.2	65.6
63.2	65.6
63.2	66.4
63.2	66.4
63.2	66.9
63.2	66.9
63.2	66.9
63.2	66.9
63.2	66.9
63.2	66.9
63.2	66.9
63.2	66.9
63.2	66.9
63.2	66.9
63.2	66.9
63.2	66.9
63.2	66.9
63.2	66.9
63.2	66.9
63.2	66.9
63.2	66.9
63.2	66.9
63.2	66.9
63.2	66.9
63.2	66.9
63.2	66.9
63.9	66.9
65.1	66.9
65.5	66.9
65.9	66.9
66.2	66.9
66.2	66.9
66.3	66.9
66.3	67.2
66.9	67.2
66.9	67.2
67	67.2
67.3	67.2
67.3	67.2
67.3	67.6
67.3	67.6
67.3	67.6
67.3	67.6
67.4	67.6
67.9	67.6
67.9	67.6
67.9	68.1
67.9	68.1
67.9	68.1
67.9	68.1
67.9	68.3
67.9	68.3
67.9	68.3
67.9	68.3
68	68.3
68	68.3
68	68.3
68	68.3
68	68.3
68	68.3
68	68.3
68	68.3
68	68.3
68	68.3
68	68.3
68	68.3
68	68.3
68	68.3
68	68.3
69	68.3
69.1	68.3
69.5	68.3
69.5	68.3
69.5	68.3
69.9	68.3
70.2	68.3
70.2	68.3
70.2	68.3
70.2	68.3
70.2	68.3
70.2	68.3
70.2	68.3
70.3	68.3
70.6	68.3
70.8	68.3
70.8	68.3
70.8	68.3
70.8	68.3
70.8	68.3
70.8	68.3
70.8	68.3
70.8	68.3
70.8	68.3
71	68.3
71	68.3
71	68.3
71	68.3
71	68.3
71	68.3
71	68.3
71	68.3
71	68.3
71	68.3
71.2	68.3
71.2	68.3
71.2	68.3
71.2	68.3
71.2	68.3
71.2	68.3
71.5	68.3
71.5	68.3
71.8	68.3
71.8	68.3
71.8	68.3
72.1	68.3
72.3	68.3
72.3	68.3
72.4	68.3
72.4	68.3
72.4	68.3
72.4	68.3
72.4	68.3
72.4	68.3
72.4	68.3
72.4	68.3
72.4	68.3
72.4	68.3
72.4	68.3
72.4	68.3
72.4	68.3
72.4	68.3
72.4	68.3
72.4	68.3
72.4	68.3
72.4	68.3
72.4	68.3
72.4	68.3
72.4	68.3
72.4	68.3
72.4	68.3
72.4	68.3
72.4	68.3
72.4	68.3
72.4	68.3
72.4	68.3
72.4	68.3
72.4	68.3
72.4	68.3
72.4	68.3
72.4	68.3
72.4	68.3
72.4	68.3
72.4	68.3
72.4	68.3
72.4	68.3
72.4	68.3
72.4	68.3
72.4	68.3
72.4	68.3
72.4	68.3
72.4	68.3
72.4	68.3
72.4	68.3
72.4	68.3
72.4	68.3
72.4	68.3
72.4	68.3
72.4	69.6
72.4	69.8
72.5	70.8
72.6	70.8
72.6	70.8
72.6	70.8
72.7	70.8
72.7	70.8
72.7	70.8
72.8	70.8
72.8	70.8
73	70.8
73	70.8
73	70.8
73.3	70.8
73.5	70.8
73.7	70.8
73.7	70.8
74.6	71.8
74.6	72.2
74.6	72.3
74.8	72.3
74.8	72.6
74.8	73.7
74.8	74.5
74.9	74.5
74.9	74.6
75	74.6
75.1	74.6
75.1	76.4
76	76.4
76.1	76.4
76.1	76.4
76.2	76.4
76.2	76.4
76.2	76.4
76.2	76.4
76.2	76.4
76.2	76.6
76.2	77.2
76.6	77.2
76.6	77.2
76.6	77.2
76.6	77.2
76.6	77.2
76.6	78.3
76.6	79.5
76.6	79.5
76.6	80.2
76.6	80.2
76.6	80.2
76.6	80.2
76.6	80.2
76.6	80.2
76.6	80.2
76.6	80.2
76.6	80.2
76.6	80.2
76.6	80.2
76.6	80.2
76.6	80.2
76.6	80.2
76.6	80.2
76.6	80.2
76.6	80.2
76.6	80.2
76.6	80.2
76.6	80.2
76.6	80.2
76.6	80.2
76.6	80.2
76.6	80.2
76.6	80.2
76.6	80.2
76.6	80.2
76.6	80.2
76.6	80.2
76.6	80.2
76.6	80.2
76.6	80.2
76.6	80.2
76.6	80.2
76.6	80.2
76.6	80.2
76.6	80.2
76.6	80.2
76.6	80.2
76.6	80.2
76.6	80.2
76.6	80.2
76.6	80.2
76.6	80.2
76.6	80.2
76.6	80.2
76.6	80.2
76.6	80.2
76.6	80.2
76.6	80.2
76.6	80.2
76.6	80.2
76.6	80.2
76.6	80.2
76.6	80.2
76.6	80.2
76.6	80.2
76.6	80.2
76.6	80.2
76.6	80.2
76.6	80.2
76.6	80.2
76.6	80.2
76.6	80.2
76.6	80.2
76.6	80.2
76.6	80.2
76.6	80.2
76.6	80.2
76.6	80.2
76.6	80.2
76.6	80.2
76.6	80.2
76.6	80.2
76.6	80.3
76.6	80.3
76.6	80.3
76.6	80.5
76.6	80.5
76.6	80.5
76.6	80.5
76.6	81.3
76.6	81.3
76.6	81.3
76.6	81.3
76.6	81.3
76.6	81.3
76.6	81.3
76.6	81.4
76.6	81.4
76.6	81.4
76.6	81.4
76.6	81.4
76.6	82.5
76.6	82.5
76.6	82.7
76.6	82.8
76.6	82.8
76.6	82.8
77	82.8
77	83.1
77.2	83.1
77.4	84.1
77.5	84.2
77.6	84.2
77.6	84.2
77.6	84.2
77.9	84.2
77.9	84.2
77.9	84.2
77.9	84.2
77.9	84.2
78	84.2
78	84.2
78.3	84.2
78.4	84.2
78.4	84.2
78.7	84.2
78.7	84.2
78.7	84.2
79.3	84.2
79.3	84.2
79.9	84.2
79.9	84.2
79.9	84.2
80	84.2
80	84.2
80	84.2
80	84.2
80	84.2
80	84.2
80	84.2
80.2	84.2
80.2	84.2
80.2	84.2
80.6	84.2
80.6	84.2
80.6	84.2
80.6	84.2
80.6	84.2
80.6	84.2
80.6	84.2
80.8	84.2
81.3	84.2
81.3	84.2
81.3	84.2
81.6	84.2
81.7	84.2
81.7	84.2
81.7	84.2
81.8	84.2
81.8	84.2
81.8	84.2
81.8	84.2
81.8	84.2
82.6	84.2
82.6	84.2
82.6	84.2
82.6	84.2
82.6	84.2
82.6	84.2
82.6	84.2
82.6	84.2
82.6	84.2
82.6	84.2
82.6	84.2
82.6	84.2
82.6	84.2
82.6	84.2
82.6	84.2
82.6	84.2
82.6	84.2
82.6	84.2
82.6	84.2
82.6	84.2
82.6	84.2
82.6	84.2
82.6	84.2
82.6	84.2
82.6	84.2
82.6	84.2
82.6	84.2
82.6	84.2
82.6	84.2
82.6	84.2
82.6	84.2
82.6	84.2
82.6	84.2
82.6	84.2
82.6	84.2
82.6	84.2
82.6	84.2
82.6	84.2
82.6	84.2
82.6	84.2
82.6	84.2
82.6	84.2
82.6	84.2
83.3	84.2
83.3	84.2
83.4	84.2
84.6	84.2
84.6	84.2
84.8	84.2
84.8	84.2
84.8	84.2
84.8	84.2
84.8	84.2
84.8	84.2
85.4	84.2
85.7	84.2
85.7	84.2
85.7	84.2
85.7	84.2
85.8	84.2
86.1	84.2
86.1	84.2
86.4	84.2
86.4	84.2
86.4	84.2
86.4	84.2
86.4	84.2
86.5	84.2
86.8	84.2
86.8	84.2
86.8	84.2
86.8	84.2
87.3	84.2
87.5	84.2
87.5	84.2
87.5	84.2
87.5	84.2
87.5	84.2
87.8	84.2
87.8	84.2
88	84.2
88.2	84.2
88.4	84.2
88.8	84.2
88.8	84.2
89	84.2
89	84.2
89	84.2
89	84.2
89	84.2
89	84.2
89	84.2
89	84.2
89	84.2
89	84.2
89	84.2
89	84.2
89	84.2
89	84.2
89	84.2
89	84.2
89	84.2
89	84.2
89	84.2
89	84.2
89	84.2
89	84.2
89	84.2
89	84.2
89	84.2
89	84.2
89	84.2
89	84.2
89	84.2
89	84.2
89	84.2
89.4	84.2
89.4	84.2
89.4	84.2
89.4	84.2
89.4	84.2
89.4	84.2
89.4	84.2
89.4	84.2
89.4	84.2
90	84.2
90	84.2
90	84.2
90	84.2
90	84.2
90	84.2
90.1	84.2
90.2	84.2
90.2	84.2
90.2	84.2
90.2	84.2
90.2	84.2
90.2	84.2
90.2	84.2
90.2	84.2
90.2	84.2
91.1	84.2
91.6	84.2
91.6	84.2
91.6	84.2
91.6	84.2
91.6	84.2
91.6	84.2
91.6	84.2
92.1	84.2
93.3	84.2
93.3	84.2
93.3	84.2
93.3	84.2
93.3	84.2
93.3	84.2
93.4	84.2
93.5	84.2
93.6	84.2
93.6	84.2
93.6	84.2
94	84.2
94	84.2
94	84.2
94	86
94	86.6
94	86.6
94	86.6
94	86.9
94	87.6
94	89
94	89
94.3	89
94.6	89
95	89.8
95	89.8
95	89.8
95	89.8
95	89.8
95	89.8
95	89.8
95	89.8
95	89.8
95	89.8
95.5	90.2
96.9	91.1
100.3	91.1
100.6	91.1
100.7	91.1
100.7	91.1
100.7	91.1
100.7	91.1
100.9	91.1
100.9	91.1
100.9	91.1
100.9	91.1
100.9	91.1
100.9	91.1
102.8	91.1
104.6	91.1
104.6	91.1
104.6	91.1
104.6	91.1
104.6	91.1
104.6	91.1
104.6	91.1
104.6	91.1
104.6	91.1
104.6	91.1
104.6	91.1
104.6	91.1
104.6	91.1
104.6	91.1
104.6	91.1
104.6	91.1
104.6	91.1
104.6	91.1
104.6	91.1
104.6	91.1
104.6	91.1
104.6	91.1
104.6	91.1
104.6	91.1
104.6	91.1
104.6	91.1
104.6
104.6
104.6
104.6
104.6
104.6
104.6
104.6
104.6
104.6
104.6
104.6
104.6
104.6
104.6
104.6
104.6
104.6
104.6
104.6
104.6
104.6
104.6
104.6
104.6
104.6
104.6
104.6
104.6
104.6
106.5
108.8

## Sheet: Fig 3a
6mer seed viability (%)	Read Counts
	2M	18M
1	0	0
2	0	0
3	1.40448	0.700945
4	15.3548	2.23486
5	0.810543	1.90157
6	3.53539	1.79392
7	0.588526	1.28702
8	11.4477	25.3543
9	0.458551	1.19165
10	42.6275	50.2994
11	1.02284	6.58928
12	0.612143	1.3557
13	19.1802	15.9623
14	15.1073	67.464
15	0	0
16	429.356	152.52
17	23.7235	27.7472
18	10.0631	23.8725
19	16.1385	17.7731
20	5.58308	10.2789
21	56.386	28.8034
22	14.9938	21.5949
23	1.97967	1.72165
24	33.2844	26.9859
25	46.2691	62.4225
26	29.7296	21.0404
27	120.05	87.696
28	5.8093	7.35311
29	147.062	237.704
30	20.6655	47.8396
31	103.881	126.294
32	59.575	79.4247
33	39.9542	182.306
34	274.046	478.351
35	0	0
36	3.06896	4.57196
37	692.36	961.456
38	615.898	532.185
39	135.915	153.951
40	22.2412	32.4086
41	14.0119	23.4185
42	23.2335	18.7933
43	482.035	798.184
44	193.538	275.446
45	161.848	144.796
46	386.228	94.2537
47	23.0045	34.0689
48	72.6535	42.6943
49	24.4074	43.9881
50	1140.33	830.659
51	11160.2	19245.9
52	183.434	339.513
53	91.3646	162.374
54	53.1585	33.133
55	306.185	531.713
56	42.4	46.4133
57	193.912	132.849
58	979.954	619.518
59	41.4573	57.5678
60	391.292	715.405
61	12057	22509.5
62	54.7697	67.383
63	115.658	88.5543
64	3948.81	6275.91
65	279.795	195.818
66	109.993	166.378
67	48.2271	64.4654
68	57.2754	64.8534
69	524.673	484.674
70	425.29	289.325
71	5600.95	2304.69
72	157.022	175.296
73	173.546	631.298
74	274.581	298.23
75	109.692	80.1312
76	1104.03	1006.47
77	166.772	352.557
78	110.917	213.656
79	2114.83	1498.11
80	448.346	342.375
81	109.332	104.847
82	1377.68	2413.02
83	880.833	1554.11
84	1160.76	867.11
85	13.3649	17.3833
86	1556.1	2658.77
87	1412.23	1260
88	1550.9	1363.41
89	42.03	31.7979
90	5.28246	5.776
91	75.2667	67.9593
92	1.63265	0.893001
93	7.5318	14.3772
94	1756.87	1187.65
95	38.0093	47.9227
96	0.609613	1.19765
97	2.04298	1.25776
98	2.18473	1.16795
99	0	0
100	0	0
101	0.853268	2.26331
102	0	0
103	0	0
104	0	0
105	0	0
106	0	0
107	0	0
108	0	0
109	0	0
110	0	0
111	0	0
112	0	0
113	0	0
114	0	0
115	0	0
116	0	0
117	0	0
118	0	0
119	0	0
120	0	0

## Sheet: Fig 3a inset
Seed viability (%)
Lo in 18M	Hi in 18M
3.7	9.7
9.8	14.3
15.8	14.3
15.8	16.2
15.8	25.1
15.8	28.9
15.8	28.9
15.8	28.9
15.8	30.2
15.8	30.9
15.8	31.2
15.8	33.2
15.8	33.2
15.8	33.2
15.8	33.2
15.8	33.2
15.8	33.9
15.8	34.5
15.8	34.5
15.8	34.5
15.8	34.5
15.8	34.5
15.8	34.5
15.8	37.3
15.8	37.3
15.8	37.3
15.8	37.3
15.8	37.3
15.8	37.3
15.8	37.3
15.8	37.3
15.8	37.3
15.8	37.3
21.4	37.3
21.4	39
24	39
24.6	43
26.4	43
26.9	43
26.9	43
26.9	43
26.9	43
29.4	43
31.2	43
32.8	43
34.4	43
34.4	44.2
37.2	44.2
37.2	44.2
37.2	45.2
37.2	46.4
37.2	50.3
37.2	50.3
37.2	50.3
37.4	50.3
37.8	51.3
37.8	51.3
37.8	51.3
37.8	51.3
37.8	51.3
37.8	51.3
37.8	51.3
38.5	51.3
39	51.3
39.2	51.3
44.5	51.3
45.2	51.3
45.2	51.3
45.2	51.3
45.2	51.3
45.2	51.3
45.6	51.3
45.6	51.3
45.6	51.3
45.6	51.3
45.6	51.3
45.6	51.3
45.6	51.3
45.6	51.3
45.6	51.3
45.6	51.3
45.6	51.3
45.6	51.3
45.6	51.3
45.6	51.3
45.6	51.3
45.6	51.3
45.6	51.3
45.6	51.3
45.6	51.3
45.6	51.3
45.6	51.3
45.6	51.3
45.6	51.3
45.6	51.3
45.6	51.3
45.6	51.3
45.6	51.3
45.6	51.3
45.6	51.3
45.6	51.3
45.6	51.3
45.6	51.3
48.4	51.3
48.4	51.3
48.4	51.3
49.6	51.3
49.6	51.3
49.6	51.3
49.6	51.3
49.6	51.3
49.6	51.3
49.6	51.3
49.6	51.3
49.6	51.3
49.6	51.3
49.6	51.3
49.6	51.3
49.6	51.3
49.6	51.3
49.6	51.3
50.2	51.3
50.2	51.3
50.2	51.3
50.2	51.3
50.2	51.3
50.2	51.3
50.2	51.3
50.2	51.3
50.2	51.3
50.2	51.3
50.4	51.3
50.4	51.3
50.4	51.3
50.4	51.3
50.4	51.3
50.4	51.3
50.4	51.3
50.4	51.3
50.4	51.3
50.4	51.3
50.4	51.3
50.4	51.3
50.4	51.3
50.4	51.3
50.4	51.3
50.4	51.3
50.4	51.3
50.4	51.3
50.4	51.3
50.6	51.3
50.9	51.3
50.9	51.3
50.9	51.3
50.9	51.3
50.9	51.3
50.9	51.3
50.9	51.3
50.9	51.3
50.9	51.3
50.9	51.3
50.9	51.3
50.9	51.3
50.9	51.3
50.9	51.3
50.9	51.3
50.9	51.3
50.9	51.3
50.9	51.3
50.9	51.3
50.9	51.3
50.9	51.3
50.9	51.3
50.9	51.3
50.9	51.3
50.9	51.3
50.9	51.3
50.9	51.3
50.9	51.3
50.9	51.3
50.9	51.3
50.9	51.3
50.9	51.3
50.9	51.3
50.9	51.3
50.9	51.3
50.9	51.3
50.9	51.3
50.9	51.3
50.9	51.3
50.9	51.3
50.9	51.3
50.9	51.3
50.9	51.3
50.9	51.3
50.9	51.3
50.9	51.3
50.9	51.3
50.9	51.3
50.9	51.3
50.9	51.3
50.9	51.3
50.9	51.3
50.9	51.3
53.8	51.3
54.2	51.3
55.3	51.3
56.5	51.3
57.2	51.3
57.2	51.3
57.2	51.3
57.3	51.3
57.3	51.3
57.3	51.3
57.9	51.3
58.1	51.3
58.3	51.3
58.3	51.3
58.3	51.3
58.3	51.3
58.3	51.3
58.3	51.3
58.3	51.3
58.3	51.3
58.3	51.3
58.3	51.3
58.3	51.3
58.3	51.3
58.3	51.3
58.3	51.3
58.3	51.3
58.3	51.3
58.3	51.3
58.3	51.3
58.3	51.3
58.3	51.3
58.3	51.3
58.3	51.3
58.3	51.3
58.3	51.3
58.3	51.3
58.3	51.3
58.3	51.3
58.3	51.3
58.3	51.3
58.3	51.3
58.3	51.3
58.3	51.3
58.3	51.3
58.3	51.3
58.3	51.3
58.3	51.3
58.3	51.3
58.3	51.3
58.3	51.3
58.5	51.3
59.8	51.3
60	51.3
63.1	51.3
63.1	51.3
63.1	51.3
63.8	51.3
63.8	51.3
64.2	51.3
64.2	51.3
64.7	51.3
64.7	51.3
64.7	51.3
64.7	51.3
64.7	51.3
64.7	51.3
64.7	51.3
64.7	51.3
64.7	51.3
64.7	51.3
65.1	51.3
65.9	51.3
67.6	51.3
69.3	51.3
69.3	51.3
69.3	51.3
69.3	51.3
69.3	51.3
69.3	51.3
69.3	51.3
69.3	51.3
69.3	51.3
69.3	51.3
69.3	51.3
69.3	51.3
69.3	51.3
69.3	51.3
69.7	51.3
69.7	51.3
69.7	51.3
69.7	51.3
69.7	51.3
69.7	51.3
69.7	51.3
69.7	51.3
69.7	51.3
69.7	51.3
69.7	51.3
69.7	51.3
69.7	51.3
69.7	51.3
70.8	51.3
70.8	51.3
70.8	51.3
71.4	51.3
71.4	51.3
71.4	51.3
71.4	51.3
71.4	51.3
71.4	51.3
71.4	51.3
71.4	51.3
71.4	51.3
71.4	51.3
71.4	51.3
71.4	51.3
71.4	51.3
71.4	51.3
71.4	51.3
71.4	51.3
71.4	51.3
71.4	51.3
71.4	51.3
71.4	51.3
71.4	51.3
71.4	51.3
71.4	51.3
71.4	51.3
71.4	51.3
71.4	51.3
71.4	51.3
71.4	51.3
71.4	51.3
71.4	51.3
71.4	51.3
71.4	51.3
71.4	51.3
71.4	51.3
71.4	51.3
71.4	51.3
71.4	51.3
71.4	51.3
71.4	52.5
71.4	52.5
71.4	52.5
71.4	52.5
71.4	52.5
71.4	53.3
71.4	53.3
71.4	54.9
71.4	54.9
71.4	54.9
71.4	54.9
71.4	54.9
71.4	54.9
71.4	55.2
71.4	58.3
71.4	59.8
71.4	59.8
71.4	60.4
71.4	60.4
71.4	60.4
71.4	60.4
71.4	60.4
71.4	60.4
71.4	60.4
71.4	60.4
71.4	60.4
71.4	60.4
71.4	60.8
71.4	60.8
71.4	60.9
71.4	60.9
71.4	60.9
71.4	60.9
71.4	60.9
71.4	60.9
71.4	60.9
71.4	60.9
71.4	60.9
71.4	60.9
71.4	60.9
71.4	60.9
71.4	60.9
71.4	60.9
71.4	60.9
71.4	60.9
71.4	60.9
71.4	60.9
71.4	60.9
71.4	60.9
71.4	60.9
71.4	60.9
71.4	60.9
71.4	60.9
71.4	60.9
71.4	60.9
71.4	60.9
71.4	60.9
71.4	60.9
71.4	60.9
71.4	60.9
71.4	60.9
71.4	60.9
71.4	60.9
71.4	60.9
71.4	60.9
71.4	60.9
71.4	60.9
71.4	60.9
71.4	60.9
71.4	60.9
71.4	60.9
71.4	60.9
71.4	60.9
71.4	60.9
71.4	60.9
71.4	60.9
71.4	60.9
71.4	60.9
71.4	60.9
71.4	60.9
71.4	60.9
71.4	60.9
71.4	60.9
71.4	60.9
71.4	60.9
71.4	60.9
71.4	60.9
71.4	60.9
71.4	60.9
71.4	60.9
71.4	60.9
71.4	60.9
71.4	60.9
71.4	60.9
71.4	60.9
71.4	60.9
71.4	60.9
71.4	60.9
71.4	60.9
71.4	60.9
71.4	60.9
71.4	60.9
71.4	60.9
71.4	60.9
71.4	60.9
71.4	60.9
71.4	60.9
71.4	60.9
71.4	60.9
71.4	60.9
71.4	60.9
71.4	60.9
71.4	60.9
71.4	60.9
71.4	60.9
71.4	60.9
71.4	60.9
71.4	60.9
71.4	60.9
71.4	60.9
71.4	60.9
71.4	60.9
71.4	60.9
71.4	60.9
71.4	60.9
71.4	60.9
71.4	60.9
71.4	60.9
71.4	60.9
71.4	60.9
71.4	60.9
71.4	60.9
71.4	60.9
71.4	60.9
71.4	60.9
71.4	60.9
71.4	60.9
71.4	60.9
71.4	60.9
71.4	60.9
71.4	60.9
71.4	60.9
71.4	60.9
71.4	60.9
71.4	60.9
71.4	60.9
71.4	60.9
71.4	60.9
71.4	60.9
71.4	60.9
71.4	60.9
71.4	60.9
71.4	60.9
71.4	60.9
71.4	60.9
71.4	60.9
71.4	60.9
71.4	60.9
71.4	60.9
71.4	60.9
71.4	60.9
71.4	60.9
71.4	60.9
71.4	60.9
71.4	60.9
71.4	60.9
71.4	60.9
71.4	60.9
71.4	60.9
71.4	60.9
71.4	60.9
71.4	60.9
71.4	60.9
71.4	60.9
71.4	60.9
71.4	60.9
71.4	60.9
71.4	60.9
71.4	60.9
71.4	60.9
71.4	60.9
71.4	60.9
71.4	60.9
71.4	60.9
71.4	60.9
71.4	60.9
71.4	60.9
71.4	60.9
71.4	60.9
71.4	60.9
71.4	60.9
71.4	60.9
71.4	60.9
71.4	60.9
71.4	60.9
71.4	60.9
71.4	60.9
71.4	60.9
71.4	60.9
71.4	60.9
71.4	60.9
71.4	60.9
71.4	60.9
71.4	60.9
71.4	60.9
71.4	60.9
71.4	60.9
71.4	60.9
71.4	60.9
71.4	60.9
71.4	60.9
71.4	60.9
71.4	60.9
71.4	60.9
71.4	60.9
71.4	60.9
71.4	60.9
71.4	60.9
71.4	60.9
71.4	60.9
71.4	60.9
71.4	60.9
71.4	60.9
71.4	60.9
71.4	60.9
71.4	60.9
71.4	60.9
71.4	60.9
71.4	60.9
71.4	60.9
71.4	60.9
71.4	60.9
71.4	60.9
71.4	60.9
71.4	60.9
71.4	60.9
71.4	60.9
71.4	60.9
71.4	60.9
71.4	60.9
71.4	60.9
71.4	60.9
71.4	60.9
71.4	60.9
71.4	60.9
71.4	60.9
71.4	60.9
71.4	60.9
71.4	60.9
71.4	60.9
71.4	60.9
71.4	60.9
71.4	60.9
71.4	60.9
71.4	60.9
71.4	60.9
71.4	60.9
71.4	60.9
71.4	60.9
71.4	60.9
71.4	60.9
71.4	60.9
71.4	60.9
71.4	60.9
71.4	60.9
71.4	60.9
71.4	60.9
71.4	60.9
71.4	60.9
71.4	60.9
71.4	60.9
71.4	60.9
71.4	60.9
71.4	60.9
71.4	60.9
71.4	60.9
71.4	60.9
71.4	60.9
71.4	60.9
71.4	60.9
71.4	60.9
71.4	60.9
71.4	60.9
71.4	60.9
71.4	60.9
71.4	60.9
71.4	60.9
71.4	60.9
71.4	60.9
71.4	60.9
71.4	60.9
71.4	60.9
71.4	60.9
71.4	60.9
71.4	60.9
71.4	60.9
71.4	60.9
71.4	60.9
71.4	60.9
71.4	60.9
71.4	60.9
71.4	60.9
71.4	60.9
71.4	60.9
71.7	60.9
71.8	60.9
72.4	60.9
72.5	60.9
73.1	60.9
73.6	60.9
73.6	60.9
73.6	60.9
73.6	60.9
73.6	60.9
73.9	60.9
73.9	60.9
74.5	60.9
74.7	60.9
74.7	60.9
74.7	60.9
74.7	60.9
75.4	60.9
75.6	60.9
75.6	60.9
75.6	60.9
75.6	60.9
75.6	60.9
75.6	60.9
75.6	60.9
75.6	60.9
75.6	60.9
75.6	60.9
75.6	60.9
75.8	60.9
75.8	60.9
75.8	60.9
75.8	60.9
75.8	60.9
75.8	60.9
75.8	60.9
75.8	60.9
75.8	60.9
75.8	60.9
75.8	60.9
75.8	60.9
75.8	60.9
75.8	60.9
75.8	60.9
75.8	60.9
75.8	60.9
75.8	60.9
75.8	60.9
75.8	60.9
75.8	60.9
75.8	60.9
75.8	60.9
75.9	60.9
77.4	60.9
77.6	60.9
79.4	60.9
79.4	60.9
79.4	60.9
79.4	60.9
79.4	60.9
79.4	60.9
79.4	60.9
79.4	60.9
79.4	60.9
79.4	60.9
79.4	60.9
79.4	60.9
79.4	60.9
79.4	60.9
79.4	60.9
79.4	60.9
79.4	60.9
79.4	60.9
79.4	60.9
79.4	60.9
79.4	60.9
79.4	61.1
79.4	63.7
79.4	63.7
79.4	63.7
79.4	63.7
79.4	63.7
79.4	63.7
79.4	63.7
79.4	63.7
79.4	63.7
79.4	63.7
79.4	63.7
79.4	63.7
79.4	63.7
79.4	63.7
79.4	63.7
79.4	63.7
79.4	63.7
79.4	63.7
79.4	63.7
79.4	63.7
79.4	63.7
79.4	63.7
79.4	63.7
79.4	63.7
79.4	63.7
79.4	63.7
79.4	63.7
79.4	63.7
79.4	63.7
79.4	63.7
79.4	63.7
79.4	63.7
79.4	63.7
79.4	63.7
79.4	63.7
79.4	63.7
79.4	63.7
79.4	63.7
79.4	63.7
79.4	63.7
79.4	63.7
79.4	63.7
79.4	63.7
79.4	63.7
79.4	63.7
79.4	63.7
79.4	63.7
79.4	63.7
80.2	63.7
80.2	63.7
80.2	63.7
80.2	63.7
80.2	63.7
80.2	63.7
80.2	63.7
80.2	63.7
80.2	63.7
80.2	63.7
80.4	63.7
80.4	63.7
80.4	63.7
80.4	63.7
80.4	63.7
80.4	63.7
80.8	63.7
81.8	63.7
81.8	63.7
81.8	63.7
81.9	63.7
81.9	63.7
81.9	63.7
81.9	63.7
81.9	63.7
81.9	63.7
81.9	63.7
81.9	63.7
81.9	63.7
81.9	63.7
81.9	63.7
81.9	63.8
81.9	65.5
81.9	65.9
81.9	67
81.9	68
82	69.2
82	69.2
82	69.2
82.2	71.4
82.2	71.4
82.2	71.4
82.2	71.4
82.2	71.4
82.2	72.2
82.7	72.2
83.7	72.7
83.7	72.7
83.7	72.7
83.7	72.7
83.7	72.7
83.7	72.7
83.7	72.7
83.7	72.7
83.7	72.7
83.7	72.7
83.7	72.7
83.7	72.7
83.7	72.7
83.7	72.7
83.7	72.7
83.7	73
83.7	73.8
83.7	73.9
83.7	73.9
83.7	73.9
83.7	76.2
83.7	76.4
83.7	76.4
83.7	76.4
84.2	76.4
84.4	76.4
84.4	76.4
84.4	76.4
84.4	76.4
84.4	77.3
84.4	77.3
84.4	77.3
84.4	77.3
84.4	77.3
84.4	77.3
84.4	78.4
84.4	78.4
84.4	78.4
85.5	78.8
85.6	78.9
85.6	79.6
85.6	82.1
85.6	82.5
85.6	82.5
85.6	82.5
85.6	82.5
86.2	82.5
86.2	82.5
86.2	82.5
86.2	82.5
86.2	82.5
86.4	82.5
86.4	82.5
86.5	82.5
87	82.5
87	82.5
87	82.5
87	82.5
87	82.5
87	82.5
87	82.5
87	82.5
87	82.5
87	82.5
87	82.5
87	82.5
87	82.5
87	82.5
87	82.5
87	82.5
87	82.5
87	82.5
87	82.5
87	82.5
87	82.5
87	82.5
87.7	82.5
88.4	82.5
88.4	82.5
88.4	82.5
88.5	82.5
88.5	82.5
88.5	82.5
88.5	82.5
88.5	82.5
88.5	82.6
88.5	82.6
88.5	83.2
88.5	83.2
88.5	83.3
88.5	83.4
88.5	83.4
88.5	83.4
88.5	83.4
88.5	83.4
88.5	83.4
88.6	83.4
90.7	83.4
90.7	83.4
90.7	83.4
94.3	83.4
94.3	83.4
94.3	83.4
94.3	83.4
94.3	83.4
94.3	83.4
94.3	83.4
94.3	83.4
94.3	84
94.3	84.4
94.3	84.4
94.3	86.2
94.3	86.2
94.3	86.2
94.3	86.2
94.3	86.2
94.3	86.2
94.3	86.2
94.3	86.2
94.3	86.2
94.3	86.2
94.3	86.2
94.3	86.2
94.3	86.2
94.3	86.2
94.3	86.2
94.3	86.2
94.3	86.2
94.3	86.2
94.3	86.2
94.3	86.2
94.3	86.2
94.3	86.2
94.3	86.2
94.3	86.2
94.3	86.2
94.3	86.2
94.3	86.2
94.3	86.2
94.3	86.2
94.3	86.2
94.3	86.2
94.3	86.2
94.3	86.2
94.3	86.2
94.3	86.2
94.3	86.2
94.3	86.2
94.3	86.2
94.3	86.2
94.3	86.2
94.3	86.2
94.3	86.2
94.3	86.7
94.3	86.7
94.3
94.3

## Sheet: Fig 3b
6mer seed viability (%)	Read Counts
	iPSCs 1 month	iPSC 5 months
1	0	0
2	0	0
3	7.992	0
4	35.963	13.252
5	105.89	41.228
6	91.906	47.118
7	305.686	228.229
8	235.757	179.637
9	143.855	144.297
10	1112.84	678.793
11	863.102	615.481
12	353.635	232.645
13	263.727	153.133
14	413.572	368.109
15	287.706	184.051
16	3318.54	2838.86
17	263.731	228.228
18	1084.87	415.229
19	219.775	136.938
20	687.288	684.681
21	1124.83	637.565
22	5410.35	3195.2
23	725.252	828.982
24	11589.9	11106.6
25	2053.86	1229.49
26	11042.5	9591.47
27	411.575	254.731
28	1178.77	1470.97
29	1146.81	438.789
30	1066.89	1013.04
31	1240.72	1796.38
32	487.496	357.801
33	933.034	977.698
34	6063.68	6076.76
35	4155.66	5306.68
36	4023.81	3505.88
37	627.36	982.118
38	1494.45	1515.14
39	859.111	892.297
40	1566.38	1400.29
41	1618.32	2230.74
42	1408.55	1055.73
43	1394.56	1437.1
44	2859.04	2216.03
45	1876.05	1741.9
46	10107.5	1597.6
47	1540.41	1198.56
48	1932	764.192
49	2934.95	7848.11
50	3228.65	4464.45
51	1076.9	868.74
52	3834.01	2461.92
53	667.319	630.204
54	2343.57	2470.76
55	6726.98	9163
56	2183.74	1917.12
57	61933.3	138031
58	6595.13	7363.67
59	6341.39	4685.31
60	3790.06	2704.87
61	2974.93	2171.84
62	16908.3	16634.2
63	74971.6	66921
64	3368.51	2051.11
65	1332.63	1811.1
66	11731.8	11271.5
67	155827	173119
68	85216.9	50615.1
69	3971.88	4128.73
70	3374.51	4689.72
71	59491.8	54128.4
72	52089.6	38820.9
73	47192.7	75524.5
74	6673.08	6421.31
75	19353.8	24965.2
76	4361.48	3742.95
77	15571.8	12350.8
78	10848.7	15198.5
79	2461.45	2249.89
80	25887	16950.7
81	7723.97	5858.84
82	7278.44	6811.5
83	39968.3	36613.7
84	33499	22485.6
85	5901.88	4467.38
86	5811.98	5579.07
87	7292.42	9083.48
88	3380.5	2151.22
89	6926.81	6963.17
90	9949.63	6609.79
91	15178.2	7045.63
92	1152.81	811.312
93	4105.74	3005.25
94	3762.09	3966.76
95	5152.63	3426.37
96	1967.97	1518.08
97	447.544	427.006
98	3134.74	1846.43
99	561.423	1077.83
100	2954.92	3944.67
101	4683.11	5372.94
102	12768.7	9762.28
103	67.931	113.378
104	133.86	85.401
105	359.628	459.403
106	109.889	44.173
107	0	0
108	0	0
109	49.948	60.37
110	31.968	23.559
111	9.99	5.89
112	0	0
113	0	0
114	0	0
115	0	0
116	0	0
117	0	0
118	0	0
119	0	0
120	0	0

[truncated: 38 more sheets: Fig 3b insert, Fig 3c, Fig 3d, Fig 4c, Fig 4d, Fig 5b, Fig 5c, Fig 5d, Fig 5e, Fig 5f, Fig 5g, Fig 5h, Fig 5i, Fig 6a, Fig 6d, Fig 6e, Fig 6i, Fig S1a, Fig S1b, Fig S2 …]
